# Supplementary material
Source: publisher figshare collection journal article supplement (https://tandf.figshare.com/ndownloader/files/13891574)
Supplement: Supplementary file 1 [file 13891574]

**APPENDIX A: Soil cadmium by territorial authority**

| **Table A-1:** Cadmium data by territorial authority, showing the number of samples (N); the mean soil cadmium on agricultural land, from the raw data and estimated from the statistical model; and the estimated percentage of farms within each territorial authority that are in each Tiered Fertiliser Management System (TFMS) tier. The Chatham Islands Territory is not included. | | | | | | | | |
| --- | --- | --- | --- | --- | --- | --- | --- | --- |
| Territorial authority | N | Mean soil cadmium (mg/kg) | | Percentage of farms in each TFMS tier | | | | |
|  | Raw | Standardised | Tier 0 | Tier 1 | Tier 2 | Tier 3 | Tier 4 |
| Ashburton District | 418 | 0.20 | 0.19 | 100.0 | 0.0 | 0.0 | 0.0 | 0.0 |
| Auckland | 290 | 0.43 | 0.39 | 92.8 | 7.1 | 0.1 | 0.0 | 0.0 |
| Buller District | 25 | 0.33 | 0.28 | 99.7 | 0.4 | 0.0 | 0.0 | 0.0 |
| Carterton District | 39 | 0.28 | 0.32 | 98.4 | 1.6 | 0.0 | 0.0 | 0.0 |
| Central Hawke's Bay District | 53 | 0.36 | 0.32 | 97.5 | 2.4 | 0.0 | 0.0 | 0.0 |
| Central Otago District | 33 | 0.12 | 0.13 | 100.0 | 0.0 | 0.0 | 0.0 | 0.0 |
| Christchurch City | 45 | 0.16 | 0.18 | 100.0 | 0.0 | 0.0 | 0.0 | 0.0 |
| Clutha District | 106 | 0.23 | 0.21 | 100.0 | 0.0 | 0.0 | 0.0 | 0.0 |
| Dunedin City | 25 | 0.18 | 0.18 | 100.0 | 0.0 | 0.0 | 0.0 | 0.0 |
| Far North District | 50 | 0.57 | 0.52 | 73.2 | 24.6 | 2.1 | 0.2 | 0.0 |
| Gisborne District | 64 | 0.32 | 0.29 | 98.8 | 1.2 | 0.0 | 0.0 | 0.0 |
| Gore District | 100 | 0.25 | 0.23 | 99.9 | 0.1 | 0.0 | 0.0 | 0.0 |
| Grey District | 23 | 0.28 | 0.21 | 100.0 | 0.0 | 0.0 | 0.0 | 0.0 |
| Hamilton City | 61 | 0.76 | 0.72 | 35.8 | 51.1 | 11.4 | 1.4 | 0.3 |
| Hastings District | 36 | 0.29 | 0.29 | 98.7 | 1.3 | 0.0 | 0.0 | 0.0 |
| Hauraki District | 82 | 0.62 | 0.59 | 58.2 | 37.4 | 4.2 | 0.2 | 0.0 |
| Horowhenua District | 12 | 0.24 | 0.26 | 99.7 | 0.3 | 0.0 | 0.0 | 0.0 |
| Hurunui District | 56 | 0.18 | 0.20 | 100.0 | 0.0 | 0.0 | 0.0 | 0.0 |
| Invercargill City | 90 | 0.31 | 0.28 | 99.5 | 0.5 | 0.0 | 0.0 | 0.0 |
| Kaikoura District | 8 | 0.30 | 0.24 | 99.6 | 0.4 | 0.0 | 0.0 | 0.0 |
| Kaipara District | 59 | 0.44 | 0.42 | 91.5 | 8.4 | 0.1 | 0.0 | 0.0 |
| Kapiti Coast District | 42 | 0.34 | 0.37 | 95.1 | 4.9 | 0.0 | 0.0 | 0.0 |
| Kawerau District | 0 |  | 0.46 | 78.0 | 17.5 | 3.4 | 0.8 | 0.3 |
| Lower Hutt City | 0 |  | 0.29 | 97.3 | 2.6 | 0.1 | 0.0 | 0.0 |
| Mackenzie District | 33 | 0.19 | 0.19 | 100.0 | 0.0 | 0.0 | 0.0 | 0.0 |
| Manawatu District | 14 | 0.35 | 0.31 | 97.7 | 2.3 | 0.1 | 0.0 | 0.0 |
| Marlborough District | 491 | 0.22 | 0.23 | 99.9 | 0.1 | 0.0 | 0.0 | 0.0 |
| Masterton District | 83 | 0.24 | 0.24 | 99.9 | 0.1 | 0.0 | 0.0 | 0.0 |
| Matamata-Piako District | 154 | 0.91 | 0.89 | 16.8 | 52.6 | 23.9 | 5.7 | 1.1 |
| Napier City | 27 | 0.46 | 0.49 | 77.3 | 20.9 | 1.7 | 0.1 | 0.0 |
| Nelson City | 11 | 0.31 | 0.30 | 98.7 | 1.3 | 0.0 | 0.0 | 0.0 |
| New Plymouth District | 106 | 0.74 | 0.65 | 44.8 | 49.0 | 5.5 | 0.6 | 0.0 |
| Opotiki District | 14 | 0.52 | 0.35 | 96.4 | 3.6 | 0.1 | 0.0 | 0.0 |
| Otorohanga District | 267 | 1.03 | 0.90 | 15.1 | 52.2 | 26.7 | 5.0 | 1.0 |
| Palmerston North City | 26 | 0.21 | 0.23 | 100.0 | 0.0 | 0.0 | 0.0 | 0.0 |
| Porirua City | 9 | 0.14 | 0.23 | 99.8 | 0.2 | 0.0 | 0.0 | 0.0 |
| Queenstown-Lakes District | 1 | 0.07 | 0.17 | 99.9 | 0.1 | 0.0 | 0.0 | 0.0 |
| Rangitikei District | 37 | 0.28 | 0.27 | 99.5 | 0.5 | 0.0 | 0.0 | 0.0 |
| Rotorua District | 96 | 0.57 | 0.50 | 76.5 | 22.8 | 0.7 | 0.1 | 0.0 |
| Ruapehu District | 27 | 0.53 | 0.48 | 79.9 | 19.6 | 0.5 | 0.0 | 0.0 |
| Selwyn District | 115 | 0.21 | 0.20 | 100.0 | 0.0 | 0.0 | 0.0 | 0.0 |
| South Taranaki District | 180 | 0.77 | 0.69 | 37.6 | 53.1 | 8.7 | 0.5 | 0.0 |
| South Waikato District | 52 | 0.85 | 0.72 | 32.5 | 57.5 | 9.2 | 0.8 | 0.1 |
| South Wairarapa District | 45 | 0.26 | 0.28 | 99.5 | 0.5 | 0.0 | 0.0 | 0.0 |
| Southland District | 415 | 0.29 | 0.26 | 99.8 | 0.2 | 0.0 | 0.0 | 0.0 |
| Stratford District | 72 | 0.84 | 0.72 | 33.3 | 54.6 | 11.3 | 0.8 | 0.1 |
| Tararua District | 73 | 0.39 | 0.33 | 97.5 | 2.5 | 0.0 | 0.0 | 0.0 |
| Tasman District | 128 | 0.41 | 0.31 | 98.8 | 1.2 | 0.0 | 0.0 | 0.0 |
| Taupo District | 81 | 0.46 | 0.42 | 90.4 | 9.4 | 0.1 | 0.0 | 0.0 |
| Tauranga City | 9 | 0.52 | 0.43 | 87.4 | 12.2 | 0.4 | 0.0 | 0.0 |
| Thames-Coromandel District | 66 | 0.60 | 0.52 | 72.6 | 25.4 | 1.9 | 0.1 | 0.0 |
| Timaru District | 154 | 0.22 | 0.21 | 100.0 | 0.0 | 0.0 | 0.0 | 0.0 |
| Upper Hutt City | 2 | 0.34 | 0.32 | 97.1 | 2.9 | 0.1 | 0.0 | 0.0 |
| Waikato District | 214 | 0.67 | 0.63 | 52.8 | 40.3 | 6.2 | 0.7 | 0.1 |
| Waimakariri District | 53 | 0.21 | 0.21 | 100.0 | 0.0 | 0.0 | 0.0 | 0.0 |
| Waimate District | 65 | 0.16 | 0.17 | 100.0 | 0.0 | 0.0 | 0.0 | 0.0 |
| Waipa District | 207 | 0.94 | 0.86 | 17.4 | 55.9 | 22.1 | 4.1 | 0.5 |
| Wairoa District | 27 | 0.30 | 0.28 | 99.0 | 1.0 | 0.0 | 0.0 | 0.0 |
| Waitaki District | 46 | 0.16 | 0.16 | 100.0 | 0.0 | 0.0 | 0.0 | 0.0 |
| Waitomo District | 104 | 0.73 | 0.67 | 43.1 | 49.5 | 6.8 | 0.5 | 0.1 |
| Wanganui District | 18 | 0.31 | 0.31 | 97.9 | 2.1 | 0.0 | 0.0 | 0.0 |
| Wellington City | 0 |  | 0.29 | 95.6 | 4.2 | 0.2 | 0.0 | 0.0 |
| Western Bay of Plenty District | 61 | 0.53 | 0.49 | 78.5 | 20.8 | 0.7 | 0.0 | 0.0 |
| Westland District | 22 | 0.29 | 0.26 | 99.7 | 0.3 | 0.0 | 0.0 | 0.0 |
| Whakatane District | 76 | 0.46 | 0.41 | 90.6 | 9.3 | 0.1 | 0.0 | 0.0 |
| Whangarei District | 61 | 0.57 | 0.53 | 71.8 | 26.2 | 1.9 | 0.1 | 0.0 |
